# Supplementary material for: Novel mixtures of ether-functionalized ionic liquids and non-flammable methylperfluorobutylether as safe electrolytes for lithium metal batteries
Source: Royal Society of Chemistry journal article supplement (doi:10.1039/c5ra01713k), 2015-01-01
Supplement: c5ra01713k1.pdf [file c5ra01713k1.pdf]

**Novel mixtures of ether-functionalized ionic liquids and non-flammable  
methylperfluorobutylether as safe electrolytes for lithium metal battery**

Shaohua Fang <sup>a\*</sup>, Long Qu <sup>a</sup>, Dong Luo <sup>a</sup>, Shumin Shen <sup>a</sup>, Li Yang <sup>a,b\*</sup>, Shin-ichi Hirano <sup>b</sup>

<sup>a</sup> *School of Chemistry and Chemical Engineering, Shanghai Jiao Tong University, Shanghai  
200240, China*

<sup>b</sup> *Hirano Institute for Materials Innovation, Shanghai Jiao Tong University, Shanghai 200240,  
China*

**\* Corresponding authors**

Tel: +86 21 54748917.

Fax: +86 21 54741297.

E-mail: housefang@sjtu.edu.cn (S.H. Fang) or liyangce@sjtu.edu.cn (L. Yang).

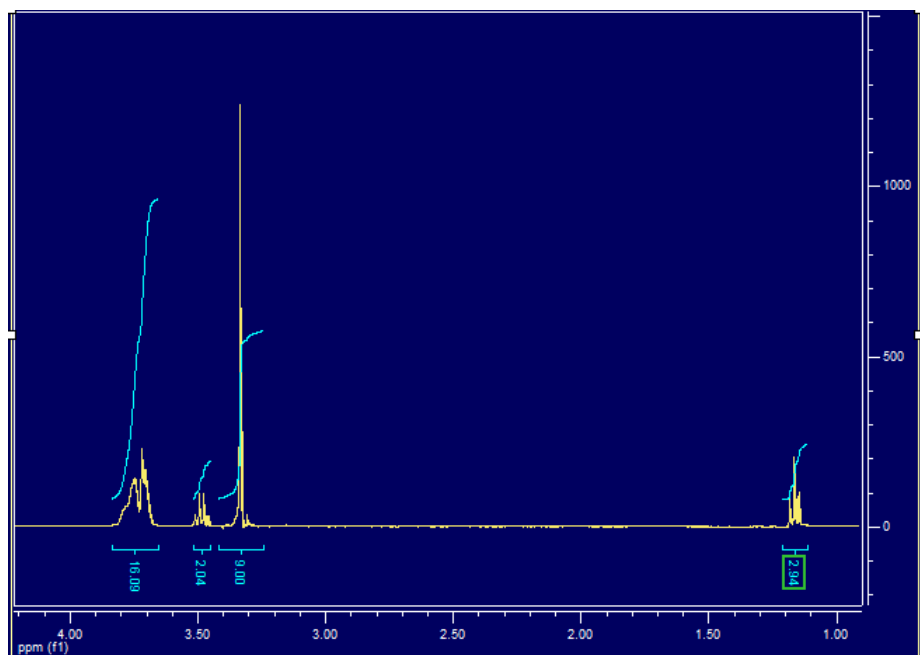

**Fig. S1** <sup>1</sup>H NMR spectrum of N(2o1)<sub>3</sub>(2o2)TFSI

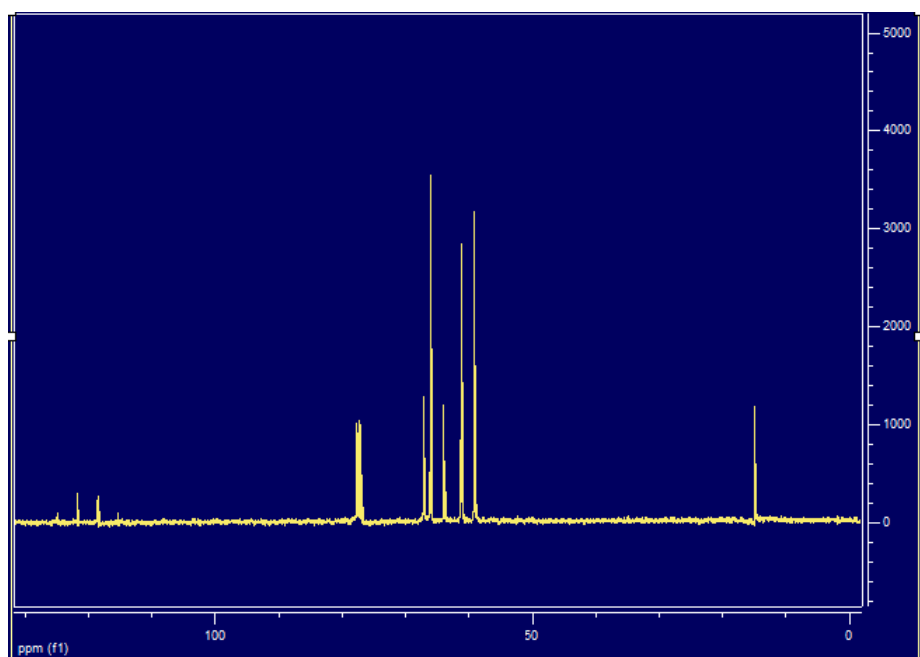

**Fig. S2** <sup>13</sup>C NMR spectrum of N(2o1)<sub>3</sub>(2o2)TFSI

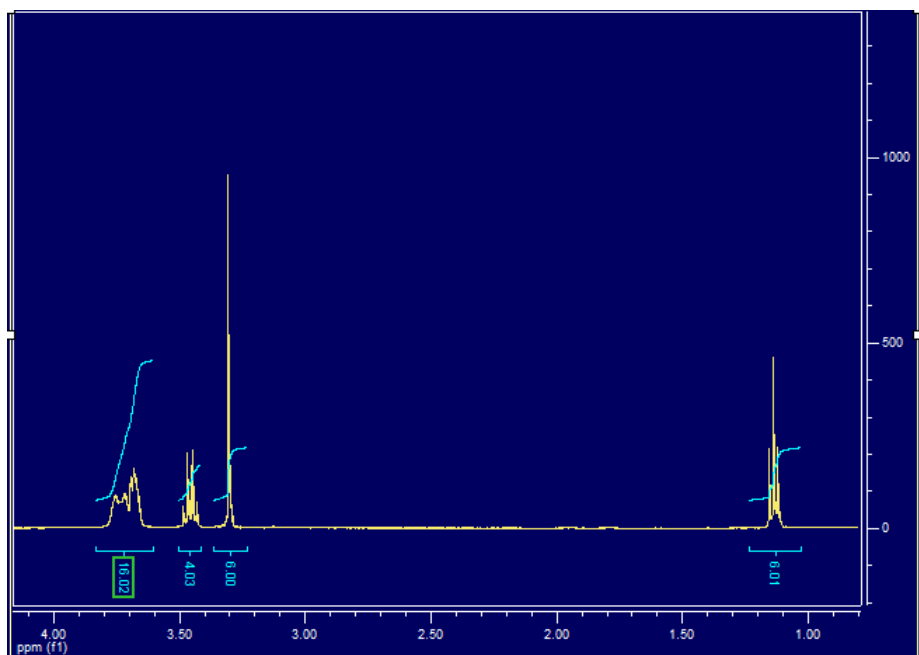

**Fig. S3** <sup>1</sup>H NMR spectrum of N(2o1)<sub>2</sub>(2o2)<sub>2</sub>TFSI

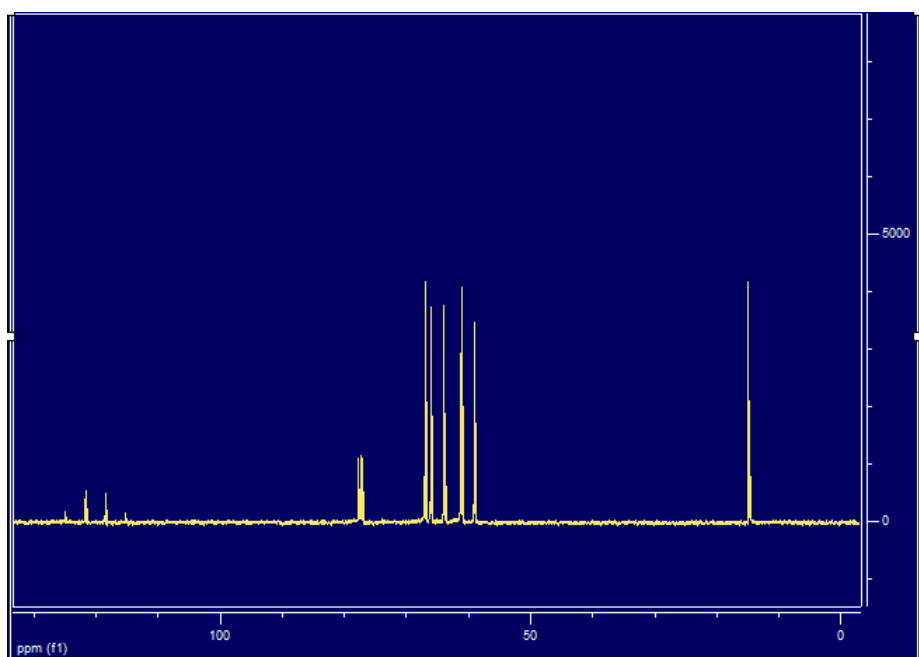

**Fig. S4** <sup>13</sup>C NMR spectrum of N(2o1)<sub>2</sub>(2o2)<sub>2</sub>TFSI

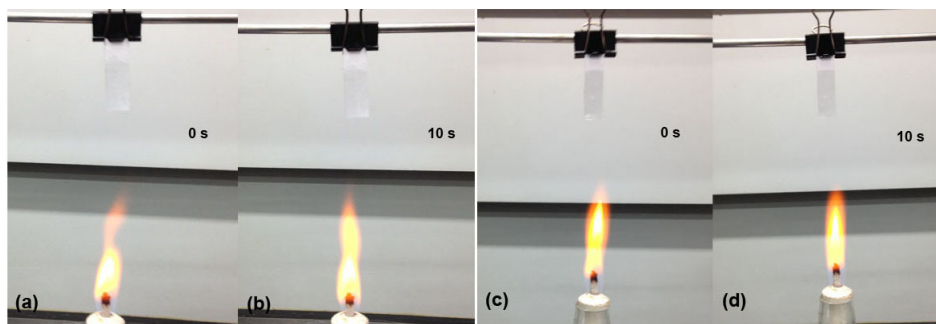

**Fig. S5** Pictures of flammability test: (a) and (b) 0.6 M LiTFSI/75 wt% N(2o1)<sub>3</sub>(2o2)TFSI+25 wt% MFE, (c) and (d) 0.6 M LiTFSI/65 wt% N(2o1)<sub>2</sub>(2o2)<sub>2</sub>TFSI+35 wt% MFE.

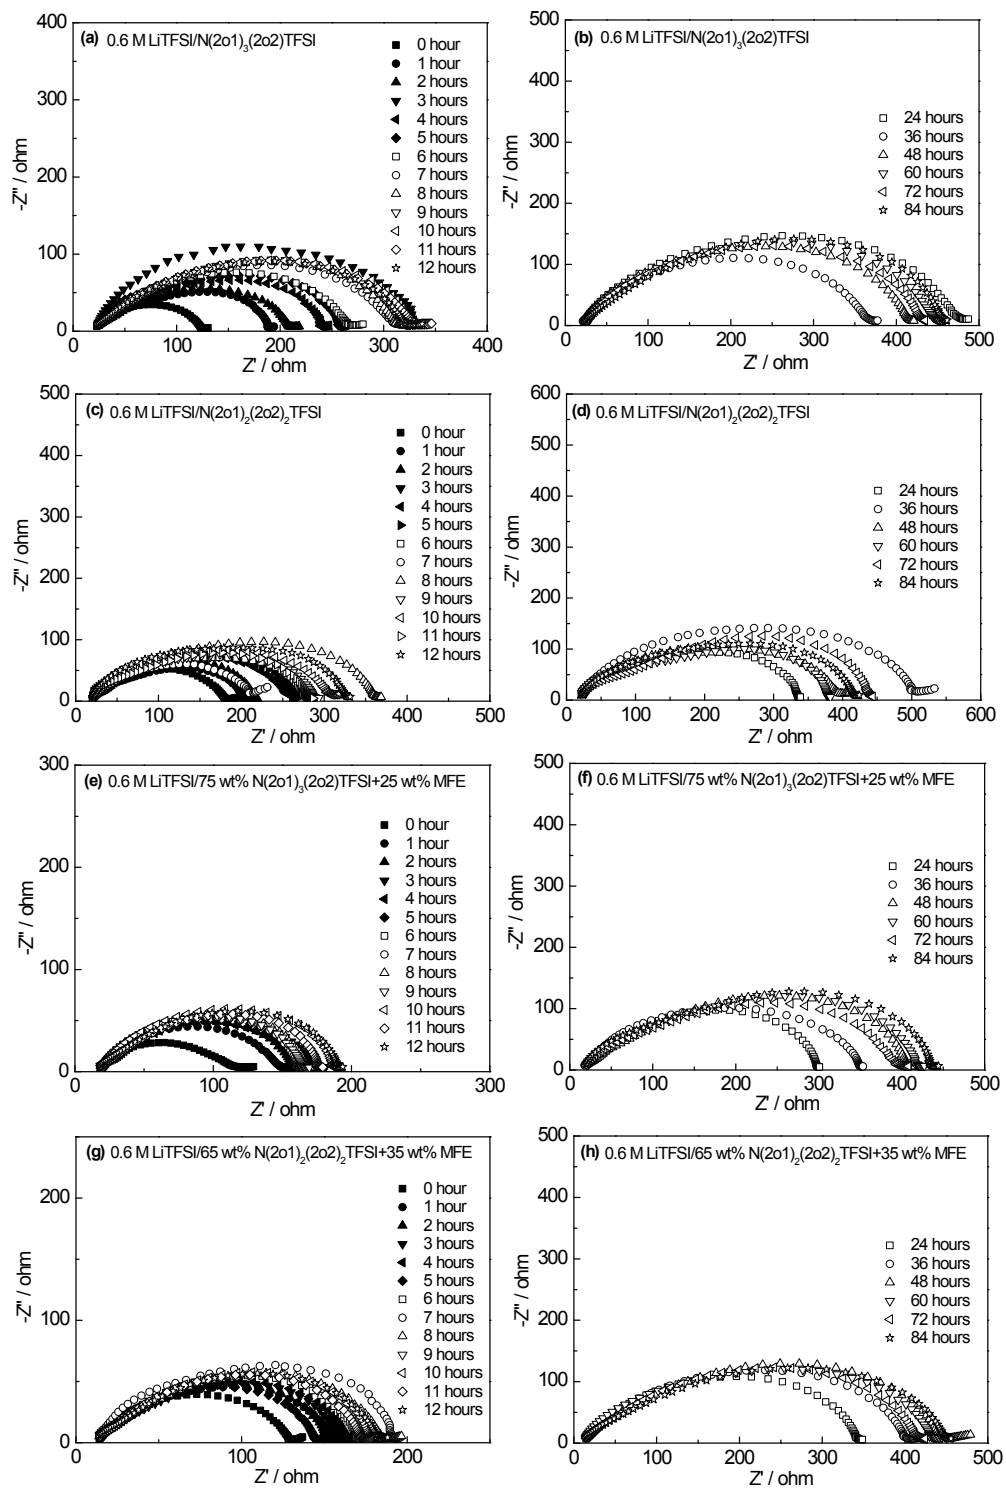

**Fig. S6** Time evolution of the impedance response of symmetric lithium cell: (a), (c), (e) and (g) from 0 h to 12 h, (b), (d), (f) and (h) from 24 h to 84 h.
